# Supplementary material for: No evidence of sustained nonzoonotic Plasmodium knowlesi transmission in Malaysia from modelling malaria case data
Source: Springer Nature journal article supplement (doi:10.1038/s41467-023-38476-8), 2023-06-01
Supplement: 41467_2023_38476_MOESM1_ESM.pdf [file 41467_2023_38476_MOESM1_ESM.pdf]

1 **Supplementary Information.**

2

3 No evidence of sustained nonzoonotic *Plasmodium knowlesi* transmission in Malaysia from  
4 modelling malaria case data

5

6 Fornace, et. al.

7

8 **1. Malaysian malaria surveillance data.**

9

10 *1.1 Geolocation and cleaning malaria surveillance data.*

11

12 Malaria surveillance data included all malaria case notifications in Malaysia reported between  
13 January 2012 to December 2020. All case records included geographic data including the  
14 names of kampungs (villages) where cases were resident and locations of infections. Exact  
15 Global Positioning System (GPS) coordinates were not available for over 20% of study  
16 records, with increasing availability in later years as GPS technology was routinely  
17 implemented.

18

19 To assess the accuracy of recorded GPS coordinates, coordinates with less than 2 decimal  
20 points were first mapped onto Google Earth and locations were manually confirmed or GPS  
21 coordinates were excluded as unreliable. For each year, GPS coordinates were also imported  
22 into Quantum GIS and overlaid with administrative shapefiles for Malaysia. State and district  
23 names were extracted from administrative polygons and compared to reported states and  
24 districts listed within surveillance data. For all data where administrative units did not match,  
25 GPS coordinates were marked as unreliable and manually confirmed. For remaining GPS  
26 coordinates, data was mapped onto publicly available satellite data (Google Earth, Open  
27 Street Map) to confirm locations. All kampungs were assigned a unique code and records  
28 were manually checked to confirm any alternate spellings of names. GPS coordinates reported  
29 from the same kampung were compared to ensure locations were consistent. For records with  
30 no GPS coordinates, the centroid of the kampung was used to geolocate records. Kampung  
31 centroids were either calculated as a mean of all available records from that kampung or  
32 manually identified from satellite data, census data or by personnel familiar with the region.

33

34 To clean nonspatial malaria data, yearly surveillance data was imported into R (R Statistical  
35 Software, v 3.6.2). As the database structure changed slightly during the reporting period, data  
36 was coded with standard headings and merged. Variables not routinely collected throughout

37 the study period (e.g. gametocyte presence) were coded as NA for missing records. The dates  
 38 of symptom onset, diagnosis, hospitalisation and notification were extracted for all records.  
 39 Onset dates were excluded as unreliable if they occurred after diagnosis and/or notification  
 40 dates. Due to recall bias, symptom onset dates were additionally excluded as unreliable if they  
 41 occurred more than 30 days prior to diagnosis.

42

### 43 1.2 Surveillance data characteristics.

44

45 Between 16 December 2011 and 3 January 2021, 32,635 malaria cases were reported to the  
 46 national surveillance system (Supplementary Tables 1 and 2).

47

48 **Supplementary Table 1.** Malaria cases by parasite species in East and West Malaysia\*,  
 49 number (%)

50

|                      | <i>P. falciparum</i> | <i>P. knowlesi</i> | <i>P. malariae</i> | <i>P. ovale</i> | <i>P. vivax</i> | Mixed infections | Total  |
|----------------------|----------------------|--------------------|--------------------|-----------------|-----------------|------------------|--------|
| East                 | 2,196                | 19,931             | 1,096              | 99              | 2,566           | 205              | 26,093 |
| Malaysia<br>(Borneo) | (6.7%)               | (61.1%)            | (3.4%)             | (0.3%)          | (7.9%)          | (0.6%)           |        |
| West                 | 853                  | 3,212              | 48                 | 20              | 2,375           | 34               | 6,542  |
| Malaysia             | (13.0%)              | (49.1%)            | (0.7%)             | (0.3%)          | (36.3%)         | (0.5%)           |        |

51 \* Includes all malaria cases, including imported cases and reoccurrences

52

53 **Supplementary Table 2.** Demographic breakdown of malaria cases, number (%)

54

|                   | <i>P. falciparum</i> | <i>P. knowlesi</i> | <i>P. vivax</i> | All Malaria    |
|-------------------|----------------------|--------------------|-----------------|----------------|
| N                 | 3,049                | 23,143             | 4,941           | 32,635         |
| Male (n, %)       | 2,484 (81.5%)        | 18,701 (80.8%)     | 4,209 (85.2%)   | 26,651 (81.7%) |
| Age (median, IQR) | 32 (21 – 43)         | 36 (26 – 49)       | 30 (21 – 42)    | 35 (24 – 47)   |
| Indigenous (n, %) | 1,678 (55.0%)        | 23,016 (99.4%)     | 2,342 (47.4%)   | 28,149 (86.3%) |

55

56

## 57 2. Serial interval estimation.

58

59 Assessing the probability of human-mosquito-human transmission of *P. knowlesi* requires  
 60 estimating the timing between reported *P. knowlesi* cases from the same transmission chain.

61 This requires estimating the duration of a series of sequential processes which need to occur

62 in a human-mosquito-human transmission cycle. The generation time ( $T_g$ ) refers to the  
63 duration of time between an infection and the individual infecting another person [1]. The serial  
64 interval (SI), the time between clinical presentation of primary and secondary cases, is more  
65 commonly used as infection is typically unobserved [2]. While these intervals can be inferred  
66 from contact tracing data for directly transmitted diseases, these intervals can only be  
67 estimated indirectly for vector-borne diseases [3]. Additionally, there is a lack of empirical  
68 evidence on human-mosquito-human *P. knowlesi* transmission as this has only been  
69 experimentally observed once. The rapid replication cycle of *P. knowlesi* and weak evidence  
70 of adaptation to humans suggests this may differ from other nonzoonotic malaria species [4].

71

72 To estimate the generation time and serial intervals for human-mosquito-human *P. knowlesi*  
73 transmission, we used a quantitative model-based approach developed by Huber et. al [5].  
74 This models the SI and  $T_g$  as random variables based on the sum of random variables  
75 representing the sequential steps in the transmission cycle including: the prepatent period, the  
76 human to mosquito transmission period, the extrinsic incubation period, the mosquito to  
77 human transmission period and infection to detection periods. These were parameterised  
78 using a combination of data from secondary literature and the Malaysian malaria surveillance  
79 dataset.

80

81 Within this analysis, we made two important assumptions. First, we assumed that  
82 asymptomatic human infections did not contribute to transmission. This was based on the very  
83 low parasite densities of human *P. knowlesi* infections detected during community surveys  
84 within Malaysia, likely insufficient to infect mosquitoes [6-8]. Second, we assumed that  
85 individuals became non-infectious on the date of diagnosis and treatment. This is based on  
86 the Malaysian national malaria policy of hospitalising malaria cases from diagnosis until  
87 confirmation as microscopy negative [9]. Within Malaysia, all malaria treatment is free through  
88 government healthcare providers.

89

90 *1. Prepatent period (PREP).* Estimates of the prepatent period for *P. knowlesi* were based on  
91 experimental *P. knowlesi* infections in people following bites from infected *An. balabacensis*,  
92 the main vector in Malaysian Borneo [10]. This was modelled as Normal(10.6 days, 1.15 days)  
93 based on data from Table 1. The time between an individual developing a patent infection and  
94 becoming symptomatic was modelled as Normal(3.5 days, 0.2 days) based on this  
95 experimental data.

96

97 *2. Human to mosquito transmission period (HTMP).* No data was available on the duration or  
98 timing of infectiousness of *P. knowlesi* in humans. However, multiple studies have reported *P.*

99 *knowlesi* gametocytes in people at both microscopic and submicroscopic densities [11-13].  
100 While *P. knowlesi* gametocytes are highly synchronous in macaques [4, 14], available  
101 evidence suggests this is not the case in human infections [13]. Infectiousness to mosquitoes  
102 is dependent on the density of malaria gametocytes, with infectious individuals predominantly  
103 having gametocyte densities high enough to be detected microscopically [15]. The presence  
104 of microscopically detected *P. knowlesi* gametocytes is captured by the Malaysian  
105 surveillance data for cases reported after 2014. These data showed a clear increasing trend  
106 in the proportion of cases with observed gametocytes relative to the time since symptom  
107 onset. Using this data, we modelled  $Y_i$ , the number of infectious individuals (defined as having  
108 gametocyte densities high enough to be detected by microscopy) out of the total number of  
109 cases ( $n_i$ ) as the realisation of a binomial random variable  $Y_i \sim \text{Binomial}(n_i, \pi_i)$ . The probability  
110 an individual was infectious ( $\pi_i$ ) was specified as  $\text{logit}(\pi_i) = \beta_0 + \beta_1 x_i$ , where  $\beta_0$  is the intercept  
111 and  $\beta_1 x_i$  describes the effect of days since symptom onset. This model was then used to  
112 simulate the probability and duration of infectiousness using 10,000 simulations. We assumed  
113 that no individuals had sufficient gametocyte densities to become infectious prior to developing  
114 patent malaria and, if an individual became infectious, they remained infectious until treatment.  
115 The duration of patent malaria was estimated as the sum of the time between an individual  
116 developing patent malaria and becoming symptomatic and the time between symptom onset  
117 and treatment. The time between symptom onset and treatment was fit to Malaysian  
118 surveillance data and modelled as a Gamma distribution. As there was insufficient data to  
119 estimate the probability of infectiousness two weeks past symptom onset, we assumed a  
120 constant probability of infectiousness after 15 days.

121

122 These probabilities of infectiousness were multiplied by a constant mosquito-to-human ratio  
123 estimated from empirical data on human landing catches in Sabah, Malaysia [16, 17]. While  
124 other models have used time-varying mosquito-to-human ratios ([5, 18]), Malaysia is  
125 equatorial and strong seasonal trends in mosquito densities are not typically observed. This  
126 could be expanded in future work to model geographic heterogeneities or uncertainties  
127 around this number.

128

129 **3. Extrinsic incubation period (EIP).** The next step in the transmission cycle occurs within the  
130 mosquito. The extrinsic incubation period (EIP) is the time between parasite transmission  
131 from an infectious human to a mosquito and the production of sporozoites within the  
132 mosquito. Previous studies have estimated the EIP for *P. knowlesi* as 10 days [17, 19]. An  
133 experimental study of *P. knowlesi* in *An. stephensi* identified the EIP as 6.8 days, however  
134 this is not a natural *P. knowlesi* vector in Malaysia [20]. To represent the uncertainty around  
135 these estimates, EIP was modelled as  $\sim \text{Normal}(10 \text{ days}, 1 \text{ day})$ .

136

137 4. *Mosquito to human transmission period (MHTP)*. Following the approach described by  
138 Huber et. al, we modelled the time between the end of the EIP and the time of a subsequent  
139 human infection as a geometric random variable with probability  $1 - p$ , where  $p$  is the  
140 constant probability of daily survival [5]. This assumes no variability in mosquito daily  
141 survival and no association between mosquito survival and probability of human infection.  
142 The probability of daily survival was estimated as 0.85 based on *An. balabacensis* data from  
143 Sabah, Malaysia [17].

144

145 5. *Infection to detection period (IDP)*. As the SI is based on reported clinical cases,  
146 estimation of the SI also requires assessing the time between human infection by a mosquito  
147 and detection by the health facility. This was modelled as the sum of the prepatent period,  
148 time between patency and symptom onset and time between symptom onset and diagnosis,  
149 with variables parameterised based on secondary literature or malaria surveillance data as  
150 described previously.

151

152 Probabilistic descriptions of the Tg and SI were obtained by summing random variables  
153 using the approach developed by Huber et. al [5]. First, the Tg was calculated as:

154

$$\begin{aligned} 155 \quad Tg(i + j + k + l) \\ 156 \quad &= \sum_i \sum_j \sum_k \sum_l (\Pr(PREP = i) \times (\Pr(HMTP = j) \times (\Pr(EIP = k) \times (\Pr(MHTP \\ 157 \quad &= l) \end{aligned}$$

158

159 Where  $i, j, k$  and  $l$  are dummy variables used to calculate the probability of the Tg for all  
160 combinations of  $i, j, k$  and  $l$ . The same approach was used to calculate the SI, accounting for  
161 the infection to detection periods of the primary and secondary cases:

162

$$163 \quad SI(-i + j + k) = \sum_i \sum_j \sum_k (\Pr(IDP = i) \times (\Pr(GI = j) \times (\Pr(IDP = k)$$

164 **Supplementary Table 3.** Parameters used for SI and Tg estimation

165

| Description                                 | Estimate                                                                                                 | Source                                                                           |
|---------------------------------------------|----------------------------------------------------------------------------------------------------------|----------------------------------------------------------------------------------|
| Prepatent period                            | ~Normal(10.6 days, 1.14 days)                                                                            | [21]                                                                             |
| Time from patent infection to symptom onset | ~Normal(3.5 days, 0.2 days)                                                                              | [21]                                                                             |
| Time from symptom onset until treatment     | ~Gamma(2.484, 0.473)                                                                                     | Fit to Malaysian surveillance data                                               |
| Duration of infectiousness                  | Binomial model fit to presence/ absence of microscopically observed gametocytes from time from infection | Fit to Malaysian surveillance data, constant rate of infectiousness after day 15 |
| Mosquito to human ratio                     | 4                                                                                                        | Mean biting rate reported by [22]                                                |
| Probability of mosquito daily survival      | 0.85                                                                                                     | [17]                                                                             |
| Infection to detection period               | Time from infection to symptom onset +<br>Time from symptom onset to treatment                           |                                                                                  |

166

167

168 **3. Estimation of  $R_c$**

169

170 *3.1 Transmission likelihood*

171

172 Based on estimates of the duration of infectiousness, we fit shifted Rayleigh distributions to  
 173 describe a prior distribution of possible serial intervals for nonzoonotic *P. knowlesi*  
 174 transmission (Figure S1a) and *P. falciparum/ P. vivax* transmission (Figure S1b). Using a  
 175 fixed value for the spatial parameter ( $\delta$ ) of 0.1, we estimated the likelihood of two cases  
 176 being connected based on the geographic location and time of reporting (Figure S1). The  
 177 fixed value for the spatial parameter corresponded to most cases being infected within a  
 178 10km radius of their reported residence location; this parameter was obtained based on  
 179 reported travel history from case investigations reporting most individuals remaining within  
 180 the same village or district prior to their diagnosis. Individuals with a history of long-range  
 181 travel were classified as imported cases according to Malaysian Ministry of Health  
 182 surveillance guidelines.

183

184 **Supplementary Figure 1.** Likelihood of two cases being part of the same transmission chain  
 185 based on notification time (X axis) and geographic distance (Y axis) with priors used for a.)  
 186 nonzoonotic *P. knowlesi* transmission and b.) *P. falciparum* and *P. vivax* transmission  
 187

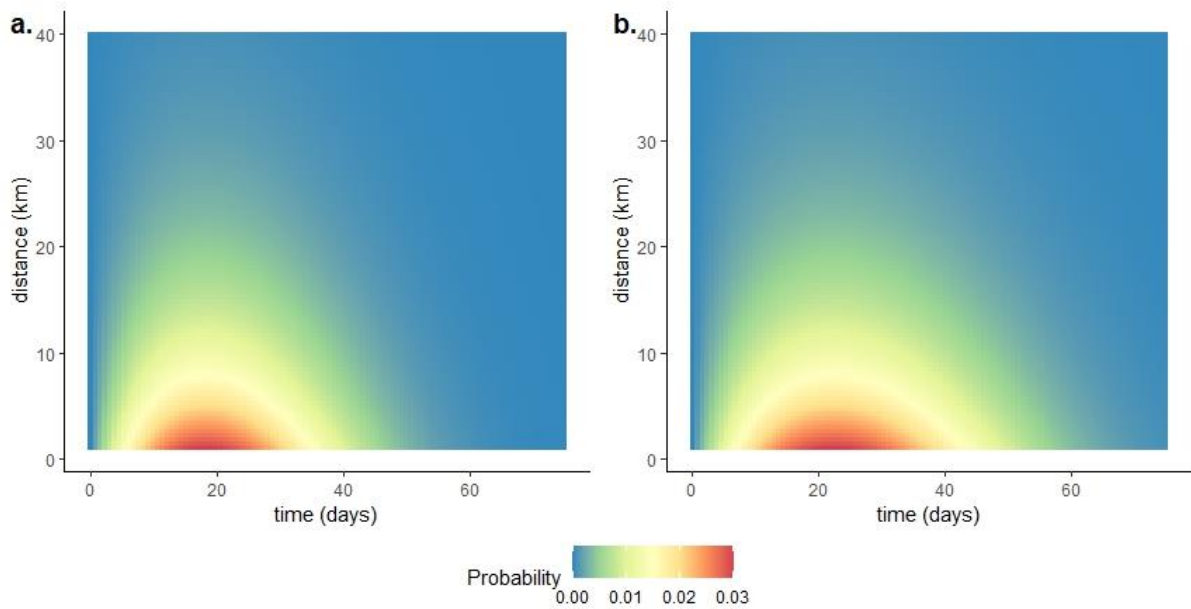

188  
 189

190 We used an adapted version of the NetRate model to estimate  $R_C$  [18, 23-25]. Data was  
 191 input as a series of  $n$  infections ( $I_1, \dots, I_n$ ) reported at times  $t = \{t_1, \dots, t_n\}$  with a binary  
 192 classification of importation status. The serial interval parameters were represented by the  
 193 function  $f_1$  and the relationship between geographic location of cases and likelihood of  
 194 transmission was represented by the function  $f_2$ , giving the function:

195

$$f(x_i, t_i | x_j, t_j; \alpha_{i,j}, \beta) = f_1(t_i | t_j; \alpha_{i,j}) \times f_2(x_i | x_j; \beta)$$

197

198 where  $t$  is the time,  $x$  is the spatial locations,  $\alpha$  is the transmission rate and  $\beta$  are the spatial  
 199 parameters. The hazard is defined as the pairwise likelihood divided by the survival function  
 200 as:

201

$$H = \frac{f(x_i, t_i | x_j, t_j; \alpha_{i,j}, \beta)}{S(x_i, t_i | x_j, t_j; \alpha_{i,j}, \beta)}$$

202

203 The pairwise likelihood of a case reported at time  $t_j$  and location  $x_j$  infecting a case reported  
 204 at time  $t_i$  and location  $x_i$  is:

205

206

$$f(x_i, t_i | x_j, t_j; \alpha_{i,j}, \beta) = \alpha(t_i - t_j - \gamma) e^{-\frac{1}{2}\alpha(t_i - t_j - \gamma)} \frac{1}{\beta}$$

207

208 With the hazard term simplifying to:

209

$$210 \quad H(x_i, t_i | x_j, t_j; \alpha_{i,j}, \beta) = \beta \alpha (t_i - t_j - \gamma) e^{-\beta(x_i - x_j)}$$

211

212 And the survival term as:

213

$$214 \quad S(x_i, t_i | x_j, t_j; \alpha_{i,j}, \beta) = e^{-\frac{1}{2}\alpha(t_i - t_j - \gamma)} \frac{1}{\beta}$$

215

216 Integrating the survival term over distances is equivalent to:

217

$$218 \quad S(x_i, t_i | x_j, t_j; \alpha_{i,j}, \beta) = e^{-\frac{1}{2}\alpha(t_i - t_j - \gamma)} \frac{\sqrt{\pi}}{2\sqrt{\beta}}$$

219

220 And the hazard function is:

221

$$222 \quad H(x_i, t_i | x_j, t_j; \alpha_{i,j}, \beta) = \frac{\alpha(t_i - t_j - \gamma) e^{-\frac{1}{2}\alpha(t_i - t_j - \gamma)} e^{-\beta(x_i - x_j)}}{e^{-\frac{1}{2}\alpha(t_i - t_j - \gamma)} \frac{\sqrt{\pi}}{2\sqrt{\beta}}}$$

223 Which simplifies to:

224

$$225 \quad H(x_i, t_i | x_j, t_j; \alpha_{i,j}, \beta) = \frac{2\sqrt{\beta\alpha}(t_i - t_j - \gamma) e^{-\beta(x_i - x_j)^2}}{\sqrt{\pi}}$$

226

227 To account for potential unobserved sources of infection, we used Epsilon edges. Within this  
228 framework, a high  $\epsilon$  value assumes the case is very likely to be from an unobserved source  
229 unless two cases have a high likelihood of being linked while a low  $\epsilon$  assumes unobserved  
230 sources of infection are highly unlikely.

231

232 With  $\epsilon$ , this gives:

233

$$234 \quad f(\mathbf{t}, \mathbf{x}; \epsilon, \beta) = \prod_{t_i \in \mathbf{t}} S_0(\epsilon_i) \prod_{I_k: t_k < t_i} S(x_i, t_i | x_j, t_j; \alpha_{i,j}, \beta) \left( H_0(\epsilon_i) + \sum_{I_k: t_k < t_i} H(x_i, t_i | x_j, t_j; \alpha_{i,j}, \beta) \right)$$

235

236 With the objective function as:



237

238

$$\text{minimize}_{\alpha, \epsilon} -\log f(\mathbf{t}, \mathbf{x}; \epsilon, \boldsymbol{\beta}) \text{ subject to } \alpha, \epsilon, \boldsymbol{\beta} > 0 \forall i, j$$

239

240 Geolocated time series data was used to fit models with varying priors on  $\epsilon$ , reflecting the  
241 uncertainty around the proportion of zoonotic transmission. Model fit was evaluating using  
242 the second order AIC (AICc), (Table S3). The best fitting models had no estimates of  $R_c$   
243 greater than one for both East and West Malaysia (Figure S2).

244

245 **Supplementary Table 4.** Model selection statistics for *P. knowlesi* models with varying  
246 normally distributed priors on  $\epsilon$  using a fixed value of  $\delta=0.1$  and priors of Normal(0.002,  
247 0.001) for  $\alpha$

248

| Dataset       | Epsilon Priors |       | Mean $R_c$ | AICc*       |
|---------------|----------------|-------|------------|-------------|
|               | Mean           | SD    |            |             |
| East Malaysia | 0.0001         | 0.001 | 0.945      | -1012488877 |
|               | 0.001          | 0.01  | 0.796      | -1012540285 |
|               | 0.01           | 0.1   | 0.431      | -1012612525 |
|               | 0.1            | 1     | 0.362      | -1012631421 |
|               | 1              | 1     | 0.074      | -1012730557 |
| West Malaysia | 0.0001         | 0.001 | 0.788      | -44737596   |
|               | 0.001          | 0.01  | 0.450      | -44748816   |
|               | 0.01           | 0.1   | 0.131      | -44762856   |
|               | 0.1            | 1     | 0.115      | -44760900   |
|               | 1              | 1     | 0.015      | -44768972   |

249 \* Lower AICc values represent improved model fit

250

251

252 **Supplementary Figure 2.** Estimated  $R_C$  values from the best fitting models for *P. knowlesi*.

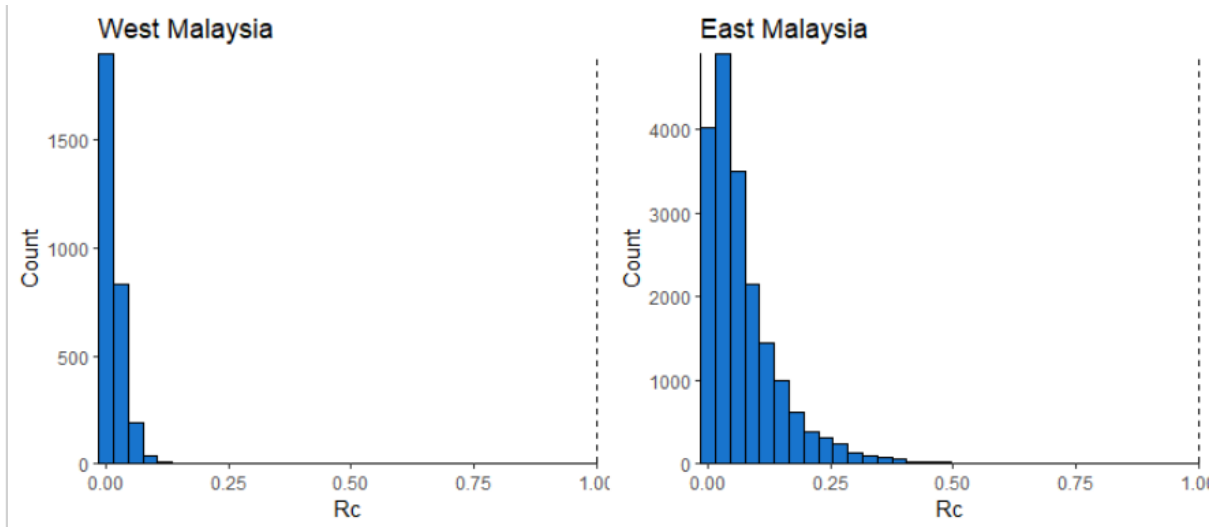

253

254

255 We additionally conducted sensitivity analyses for *P. falciparum* and *P. vivax* models to  
 256 assess the impact of varying priors on  $\epsilon$  while using established distributions for the temporal  
 257 component. As transmission of these models is known to be nonzoonotic and extensive local  
 258 transmission was documented during the study period, we excluded unlikely scenarios  
 259 where all cases were imported (Supplementary Table 4).

260

261 **Supplementary Table 5.** Model selection statistics for *P. knowlesi* models with varying  
 262 normally distributed priors on  $\epsilon$  using a fixed value of  $\delta=0.1$  and priors of Normal(0.003,  
 263 0.001) for  $\alpha$  for a.) *P. falciparum* and b.) *P. vivax*

264 a.)

| Dataset       | Epsilon Priors |         | Mean $R_C$ | Percent $R_C > 1$ | AICc*     |
|---------------|----------------|---------|------------|-------------------|-----------|
|               | Mean           | SD      |            |                   |           |
| East Malaysia | 0.0001         | 0.001   | 0.568      | 20.89%            | 250425034 |
|               | 0.00001        | 0.01    | 0.568      | 20.95%            | 250425274 |
|               | 0.000001       | 0.1     | 0.565      | 20.90%            | 250487594 |
| West Malaysia | 0.0001         | 0.001   | 0.386      | 9.14%             | 6401555   |
|               | 0.00001        | 0.0001  | 0.101      | 10.13%            | 6401460   |
|               | 0.000001       | 0.00001 | 0.099      | 9.91%             | 6403864   |

265

266 b.)

| Dataset       | Epsilon Priors |         | Mean $R_C$ | Percent $R_C > 1$ | AICc*     |
|---------------|----------------|---------|------------|-------------------|-----------|
|               | Mean           | SD      |            |                   |           |
| East Malaysia | 0.0001         | 0.001   | 0.524      | 20.31%            | 652347120 |
|               | 0.00001        | 0.01    | 0.547      | 21.19%            | 652347568 |
|               | 0.000001       | 0.1     | 0.558      | 21.47%            | 652347952 |
| West Malaysia | 0.0001         | 0.001   | 0.230      | 8.61%             | 219812878 |
|               | 0.00001        | 0.0001  | 0.246      | 8.92%             | 219813166 |
|               | 0.000001       | 0.00001 | 0.250      | 9.13%             | 219842030 |

267

268

### 269 3.2 Spatiotemporal models of $R_C$

270

271 To visualise the spatial and temporal distributions of *P. falciparum* and *P. vivax* cases with  
 272  $R_C$  estimates  $> 1$ , we fit geostatistical models using Integrated Nested Laplace  
 273 Approximation (INLA) in R statistical software. For each species, we classified  $R_C$  estimates  
 274 into binary classes based on whether  $R_C$  estimates were greater than 1. We resampled all  
 275 data to 5 km<sup>2</sup> grid cells and calculated the total number of *P. falciparum* or *P. vivax* cases  
 276 per grid cell ( $m_{i,t}$ );  $i = 1 \dots n$ ;  $t = 1 \dots n$ ; where  $i$  indexes location and  $t$  indexes year. For each  
 277 species, we fit separate models for the probability of a malaria case leading to onward  
 278 transmission ( $R_C > 1$ ) was modelled as:

279

$$280 Y_{i,t} \sim \text{Binomial}(m_{i,t}, \pi_{i,t})$$

281 Where  $\pi_{i,t}$  is the probability of a malaria case having an  $R_C$  estimate over 1 with the linear  
 282 predictor for the binomial model specified as:

283

$$284 \text{logit}(\pi_{i,t}) = \beta_0 + w_i + e_t$$

285 Where  $\beta_0$  is the intercept,  $w_i$  is the spatial effect and  $e_t$  is the temporal effect. Candidate  
 286 models including the temporal effect as a random effect, temporally structured random walk  
 287 models or autoregressive models were evaluated using the Deviance Information Criteria  
 288 (DIC). The final model included the temporal effect as a temporally structured random walk  
 289 model of order 2 [26]. The spatial effect  $w_i$  was modelled as a Matern covariance function  
 290 implemented using the stochastic partial differential equations approach. All models used  
 291 1,000 samples to estimate posterior probabilities and were visualised in R. As there were no  
 292  $R_C$  estimates above 1 for the best fitting *P. knowlesi* models, models were only fit for *P.*  
 293 *falciparum* and *P. vivax*. Mean and maximum  $R_C$  estimates per village per year are included  
 294 below in Figure S3.

295

296

297 **Supplementary Figure 3.**  $R_C$  estimates for *P. knowlesi* per village per year, including a)  
298 mean  $R_C$  estimates and b) maximum  $R_C$  estimates (areas with highest probability of  
299 nonzoonotic *P.knowlesi* transmission)

300

301 a.)

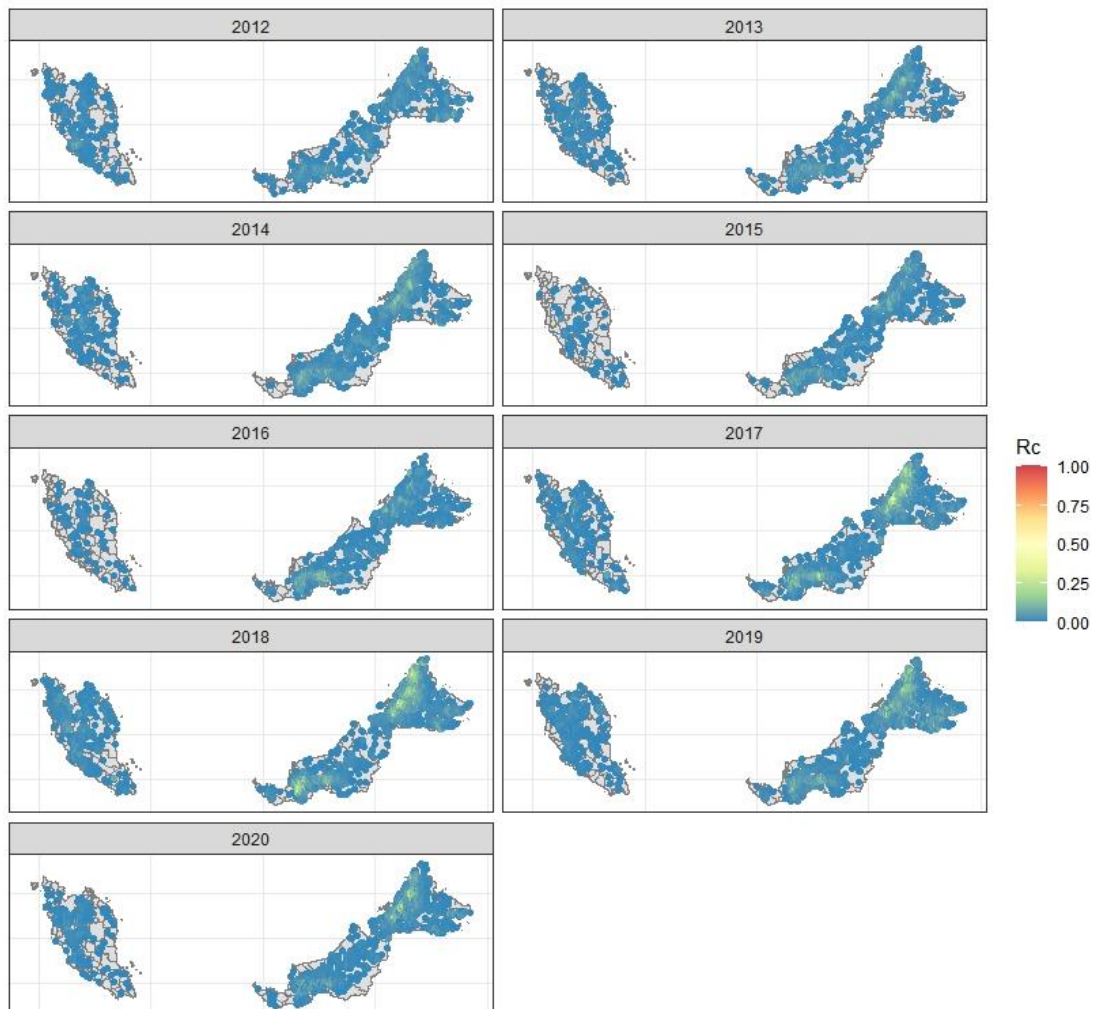

302

303 b.)

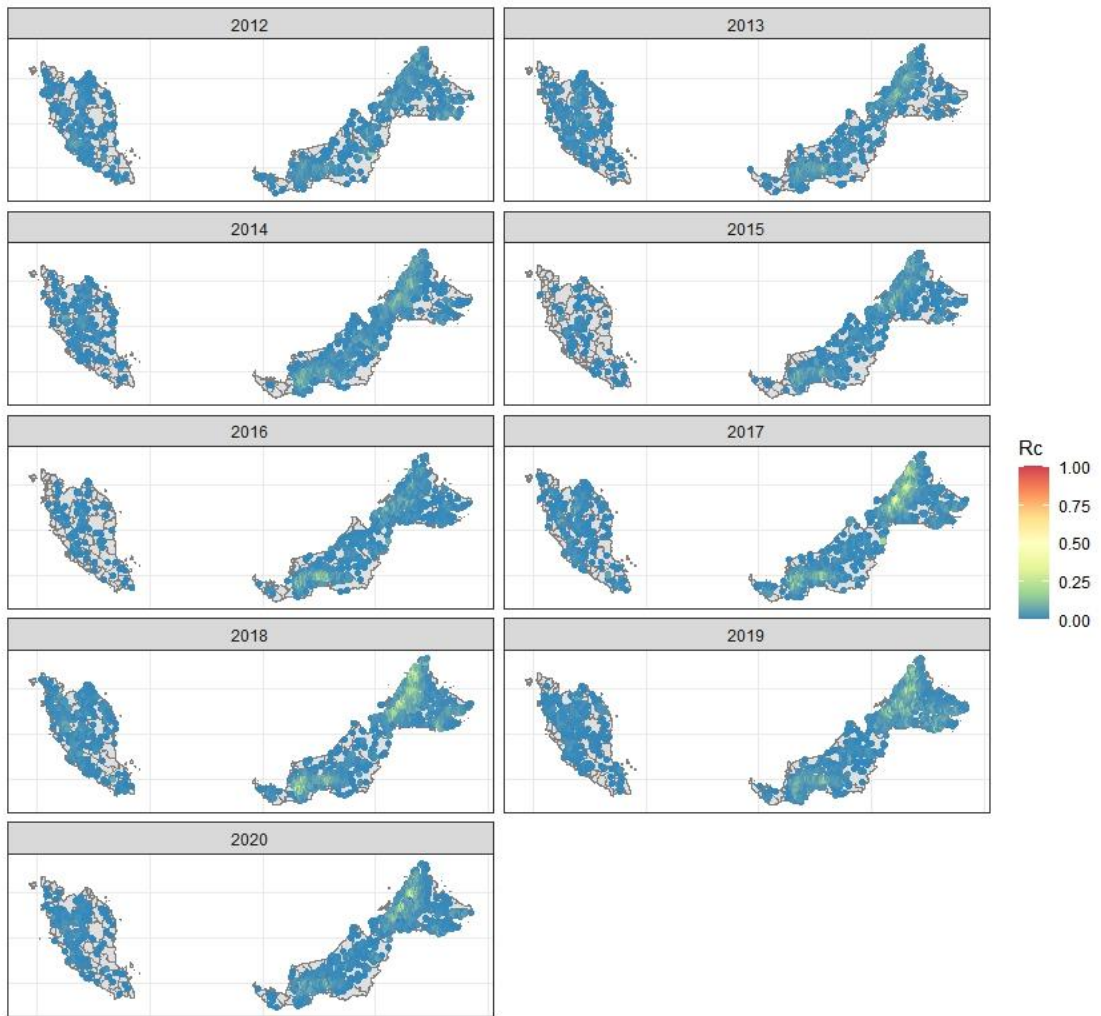

304

305

306

307

308

309

310

311

312

- 313 1. Champredon, D. and J. Dushoff, *Intrinsic and realized generation intervals in*  
314 *infectious-disease transmission*. Proc Biol Sci, 2015. **282**(1821): p. 20152026.
- 315 2. Fine, P.E., *The interval between successive cases of an infectious disease*. Am J  
316 Epidemiol, 2003. **158**(11): p. 1039-47.
- 317 3. Park, S.W., D. Champredon, and J. Dushoff, *Inferring generation-interval*  
318 *distributions from contact-tracing data*. J R Soc Interface, 2020. **17**(167): p.  
319 20190719.
- 320 4. Hawking, F., M.J. Worms, and K. Gammage, *24 and 48 hour cycles of malaria*  
321 *parasites in the blood; their purpose, production and control*. Transactions of the  
322 Royal Society of Tropical Medicine and Hygiene, 1968. **82**(6): p. 731-765.
- 323 5. Huber, J.H., et al., *Quantitative, model-based estimates of variability in the*  
324 *generation and serial intervals of Plasmodium falciparum malaria*. Malar J, 2016.  
325 **15**(1): p. 490.
- 326 6. Fornace, K.M., et al., *Environmental risk factors and exposure to the zoonotic malaria*  
327 *Plasmodium knowlesi across Northern Sabah, Malaysia: a cross-sectional survey*.  
328 Lancet Planet Health, 2019. **3**(4): p. E179-E186.
- 329 7. Fornace, K.M., et al., *Exposure and infection to Plasmodium knowlesi in case study*  
330 *communities in Northern Sabah, Malaysia and Palawan, The Philippines*. PLoS  
331 Neglected Tropical Diseases [electronic resource], 2018. **12**(6): p. e0006432.
- 332 8. Fornace, K.M., et al., *Asymptomatic and Submicroscopic Carriage of Plasmodium*  
333 *knowlesi Malaria in Household and Community Members of Clinical Cases in Sabah,*  
334 *Malaysia*. J Infect Dis, 2016. **213**(5): p. 784-7.
- 335 9. Ministry of Health Malaysia, *Management guidelines of malaria in Malaysia*. 2014,  
336 Vector Borne Disease Sector, Disease Control Division, Ministry of Health, Malaysia:  
337 Putra Jaya.
- 338 10. Chin, W., et al., *Experimental mosquito-transmission of Plasmodium knowlesi to man*  
339 *and monkey*. American Journal of Tropical Medicine & Hygiene, 1968. **17**(3): p. 355-  
340 8.
- 341 11. Grigg, M.J., et al., *Artesunate-mefloquine versus chloroquine for treatment of*  
342 *uncomplicated Plasmodium knowlesi malaria in Malaysia (ACT KNOW): an open-*  
343 *label, randomised controlled trial*. Lancet Infect Dis, 2016. **16**(2): p. 180-8.
- 344 12. Maeno, Y., et al., *Plasmodium knowlesi and human malaria parasites in Khan Phu,*  
345 *Vietnam: Gametocyte production in humans and frequent co-infection of mosquitoes*.  
346 Parasitology, 2017. **144**(4): p. 527-535.
- 347 13. Lee, K.S., J. Cox-Singh, and B. Singh, *Morphological features and differential counts*  
348 *of Plasmodium knowlesi parasites in naturally acquired human infections*. Malar J,  
349 2009. **8**: p. 73.
- 350 14. Anderios, F., A. Noorain, and I. Vythilingam, *In vivo study of human Plasmodium*  
351 *knowlesi in Macaca fascicularis*. Exp Parasitol, 2010. **124**(2): p. 181-9.
- 352 15. Bradley, J., et al., *Predicting the likelihood and intensity of mosquito infection from*  
353 *sex specific Plasmodium falciparum gametocyte density*. Elife, 2018. **7**.
- 354 16. Fornace, K.M., et al., *Local human movement patterns and land use impact exposure*  
355 *to zoonotic malaria in Malaysian Borneo*. Elife, 2019. **8**.
- 356 17. Wong, M.L., et al., *Seasonal and Spatial Dynamics of the Primary Vector of*  
357 *Plasmodium knowlesi within a Major Transmission Focus in Sabah, Malaysia*. PLoS  
358 Negl Trop Dis, 2015. **9**(10): p. e0004135.
- 359 18. Routledge, I., et al., *Estimating spatiotemporally varying malaria reproduction*  
360 *numbers in a near elimination setting*. Nat Commun, 2018. **9**(1): p. 2476.
- 361 19. Imai, N., et al., *Transmission and control of Plasmodium knowlesi: a mathematical*  
362 *modelling study*. PLoS Negl Trop Dis, 2014. **8**(7): p. e2978.
- 363 20. Hawking, F., et al., *Transmission of Plasmodium knowlesi by Anopheles stephensi*.  
364 Trans R Soc Trop Med Hyg, 1957. **51**(5): p. 397-402.
- 365 21. Chin, W., et al., *Experimental mosquito-transmission of Plasmodium knowlesi to man*  
366 *and monkey*. Am J Trop Med Hyg, 1968. **17**(3): p. 355-8.

- 367 22. Fornace, K.M., et al., *Local human movement patterns and land use impact exposure*  
368 *to zoonotic malaria in Malaysian Borneo*. eLife, 2019. **8**(10): p. 22.
- 369 23. Routledge, I., et al., *Tracking progress towards malaria elimination in China:*  
370 *Individual-level estimates of transmission and its spatiotemporal variation using a*  
371 *diffusion network approach*. PLoS Comput Biol, 2020. **16**(3): p. e1007707.
- 372 24. Routledge, I., H.J.T. Unwin, and S. Bhatt, *Inference of malaria reproduction numbers*  
373 *in three elimination settings by combining temporal data and distance metrics*. Sci  
374 Rep, 2021. **11**(1): p. 14495.
- 375 25. Gomez-Rodriguez, M., D. Balduzzi, and B. Scholkopf, *Uncovering the temporal*  
376 *dynamics of diffusion networks*. Proceedings of the 28th International Conference on  
377 Machine Learning, 2011.
- 378 26. Lindgren, F. and H. Rue, *Bayesian Spatial Modelling with R-INLA*. Journal of  
379 Statistical Software, 2015. **63**(19).
- 380
